# Supplementary material
Source: publisher figshare collection journal article supplement (https://acs.figshare.com/ndownloader/files/3845320)
Supplement: Supplementary file 1 [file 3845320]

## Supporting Information

### Co<sub>3</sub>O<sub>4</sub>@MWCNT nanocable as cathode with superior electrochemical performance for supercapacitors

Xiaowei Wang<sup>a</sup>, Minxia Li<sup>a</sup>, Zheng Chang<sup>a</sup>, Yaqiong Yang<sup>a</sup>, Yuping Wu<sup>a,b\*</sup>, Xiang Liu<sup>b,\*</sup>

<sup>a</sup> *New Energy and Materials Laboratory (NEML), Department of Chemistry & Shanghai Key Laboratory of Molecular Catalysis and Innovative Materials, Fudan University, Shanghai 200433, China*

<sup>b</sup> *College of Energy, Nanjing Tech University, Nanjing 211816, Jiangsu Province,, China*

#### Experimental details

Commercial MWCNT (multiwall CNTs, outer diameter 10–20 nm) were treated in 6 M HNO<sub>3</sub> for 2 h with sonication to remove the impurities and endow the surface with hydrophilic groups such as –OH and –COOH. After being washed for several times, the as-treated MWCNT were filtered and collected as paper-like pieces.

Coating solution was prepared by dissolving 0.36 mmol Co(Ac)<sub>2</sub>·4H<sub>2</sub>O into 30 ml distilled water. The MWCNT were dispersed into the aqueous solution, and then 4mL ammonia solution (NH<sub>3</sub>·H<sub>2</sub>O,

25%) was dropwise added into the mixture solution. The as-obtained mixture was transferred into a 40 mL Teflon-lined stainless steel autoclave and heated at 150 °C for 5 h. After drying at 80 °C for 12 h, a hybrid of Co<sub>3</sub>O<sub>4</sub> crystal coating layer on MWCNT was obtained and then calcined at 250 °C in air atmosphere for 2 h. Finally, the targeted Co<sub>3</sub>O<sub>4</sub>@MWCNT nanocable was achieved. Meanwhile, hydrothermally prepared nanostructured Co<sub>3</sub>O<sub>4</sub> without MWCNT under the same reactive condition was also used for the comparison with the targeted material.

Both the prepared Co<sub>3</sub>O<sub>4</sub>@MWCNT nanocable and pristine Co<sub>3</sub>O<sub>4</sub> were mixed with acetylene black and poly(tetrafluoroethylene) (PTFE) in a weight ratio of 8:1:1 with the help of ethanol. After drying, the mixture was pressed into a film with an active mass loading of about 6 mg/cm<sup>2</sup>. Next, the film was cut into disks. These disks were pressed onto Ni-grid at a pressure of 10 MPa and then dried at 80 °C overnight to act as working electrodes.

The cyclic voltammetry (CV) data were collected at different scan rates on an electrochemical working station CHI440B (Chenhua). A three-electrode cell consisting of the above working electrode, Ni-grid as the counter electrode and SCE as the reference electrode was used to test the charge/discharge behaviors including rate capability and cycling behavior in 0.5 M KOH aqueous solution on a cell tester (Land).

1. Charge-discharge plot of the hybrid of pristine  $\text{Co}_3\text{O}_4$  with MWCNT

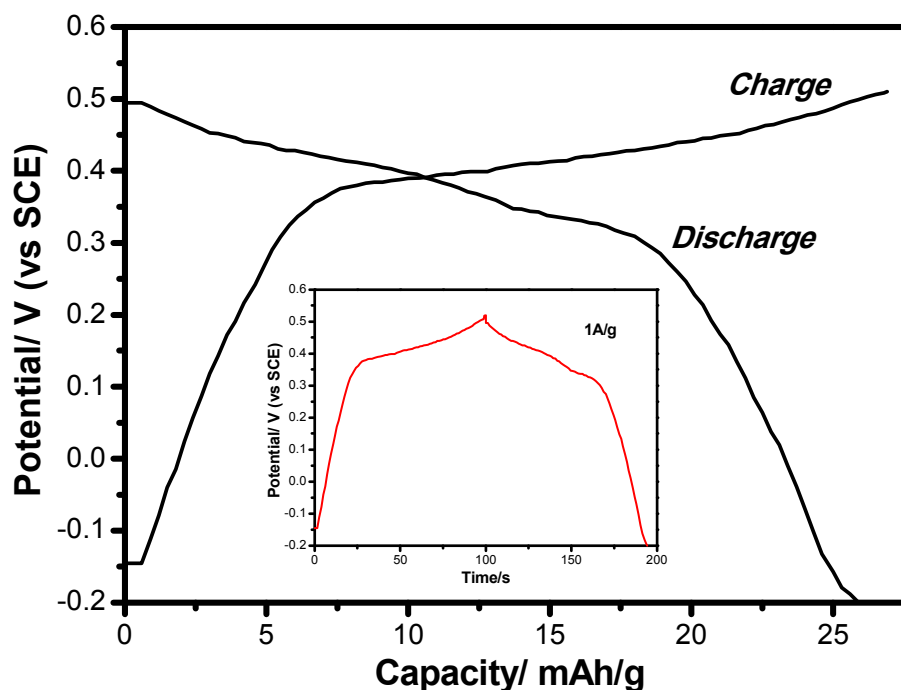

**Figure S1** The charge-discharge plot of the hybrid of pristine  $\text{Co}_3\text{O}_4$  with MWCNT.

The electrochemical performance of the hybrid containing pristine  $\text{Co}_3\text{O}_4$  and MWCNT with the same weight amount of  $\text{Co}_3\text{O}_4$  41.88 wt.% was measured under the same condition of  $0.5 \text{ mol l}^{-1}$  KOH within a smaller electrochemical window between  $-0.2 \text{ V}$  and  $0.52 \text{ V}$ , compared with that of pristine  $\text{Co}_3\text{O}_4$   $-0.2 \text{ V}$  and  $0.56 \text{ V}$  at a current density of  $1 \text{ A g}^{-1}$ . The fixed potential range even cannot reach the same level with pristine

Co<sub>3</sub>O<sub>4</sub>. The hybrid delivers a specific capacity of 25 mAh g<sup>-1</sup> at a current density of 1 A g<sup>-1</sup>, 125 F g<sup>-1</sup> which is calculated in the same way with Co<sub>3</sub>O<sub>4</sub>@MWCNT nanocable in this paper, indicating that MWCNT plays very little part to the capacitance increase of the hybrid of Co<sub>3</sub>O<sub>4</sub> with MWCNT. This means that the excellent capacitance of Co<sub>3</sub>O<sub>4</sub>@MWCNT nanocable is mainly derived from the Co<sub>3</sub>O<sub>4</sub> while the MWCNT act as an adjuvant to construct a conductive core nanocable to promote the performance of the Co<sub>3</sub>O<sub>4</sub>@MWCNT nanocable. Also, as it is shown in the inset of **Figure S1**, the discharge time of the hybrid has been similar to pristine Co<sub>3</sub>O<sub>4</sub> for less than 200 s. Moreover, the working electrode material is more and more difficult to be made into a film when the amount of MWCNT increases, so we measured the electrochemical performance of the hybrid containing pristine Co<sub>3</sub>O<sub>4</sub> and MWCNT with the same weight amount of Co<sub>3</sub>O<sub>4</sub> instead of MWCNT only.

2. Mean absolute deviation and Standard deviation of the capacitance of Co<sub>3</sub>O<sub>4</sub>@MWCNT nanocable and pristine Co<sub>3</sub>O<sub>4</sub>

| Cell number<br>Current density | Charge capacitance(Discharge capacitance)/ F/g |                         |                         |                         |                         |                          | Mean<br>Absolute<br>Deviation | Standard<br>Deviation |
|--------------------------------|------------------------------------------------|-------------------------|-------------------------|-------------------------|-------------------------|--------------------------|-------------------------------|-----------------------|
|                                | 1                                              | 2                       | 3                       | 4                       | 5                       | Mean                     |                               |                       |
| Nanocable (15A/g)              | 584.30769<br>(583.41)                          | 585.38462<br>(584.373)  | 590.85385<br>(589.12)   | 586.84615<br>(585.86)   | 586.15385<br>(585.15)   | 586.70923<br>(585.5826)  | 1.52592<br>(1.40308)          | 2.50135<br>(1.99585)  |
| Nanocable (20A/g)              | 567.69231<br>(558.46154)                       | 565.38462<br>(559.3077) | 562.61538<br>(558.7692) | 565.84615<br>(559.4615) | 567.23077<br>(562.1534) | 565.75385<br>(560.631)   | 1.99385<br>(1.71262)          | 2.85632<br>(2.17719)  |
| Nanocable (30A/g)              | 548.30769<br>(543.6923)                        | 542.30769<br>(536.7692) | 543.69231<br>(539.0769) | 548.76923<br>(538.1538) | 547.84615<br>(536.7692) | 546.18462<br>(538.89231) | 4.34462<br>(2.54769)          | 5.09484<br>(2.96608)  |
| Nanocable (50A/g)              | 552.46154<br>(538.53846)                       | 560.76923<br>(543.6923) | 550.46154<br>(536.3077) | 561.69231<br>(546.4615) | 553.61538<br>(539.3846) | 555.8<br>(540.8769)      | 4.5415<br>(3.36)              | 5.31671<br>(4.11362)  |
| Nanocable (80A/g)              | 515.07692<br>(510.76923)                       | 510.92308<br>(505.6923) | 508.84615<br>(502.6154) | 509.76923<br>(505.8462) | 515.53846<br>(505.3077) | 512.03077<br>(506.0462)  | 2.62154<br>(1.8892)           | 3.08489<br>(2.9491)   |
| Nanocable (100A/g)             | 513.23077<br>(512)                             | 510.92308<br>(502.1538) | 513.23077<br>(511.8462) | 505.23077<br>(500.3077) | 513.61538<br>(508.1538) | 511.24615<br>(506.8923)  | 2.53538<br>(4.5292)           | 3.52774<br>(5.4321)   |
| Pristine Co3O4(1A/g)           | 125.52632<br>(121.2632)                        | 125.52632<br>(121.2632) | 126<br>(120.3158)       | 125.05263<br>(121.2632) | 125.05263<br>(121.2632) | 125.43158<br>(121.0737)  | 0.30316<br>(0.30316)          | 0.39631<br>(0.4237)   |
| Pristine Co3O4(3A/g)           | 109.42105<br>(108.4737)                        | 109.42105<br>(106.579)  | 107.52632<br>(108.4737) | 108.47368<br>(105.1579) | 108<br>(108)            | 108.56842<br>(107.3368)  | 0.68211<br>(1.1747)           | 0.84735<br>(1.4445)   |
| Pristine Co3O4(5A/g)           | 103.89474<br>(102.3158)                        | 104.68421<br>(103.7368) | 102.78947<br>(103.7368) | 103.26316<br>(102.7895) | 103.26316<br>(100.8947) | 103.57895<br>(102.6947)  | 0.56842<br>(0.8716)           | 0.73213<br>(1.1795)   |
| Pristine Co3O4(8A/g)           | 99<br>(98.5263)                                | 98.05263<br>(93.7895)   | 98.10526<br>(97.0526)   | 99.57895<br>(97.4737)   | 98.52632<br>(97.579)    | 98.65263<br>(96.8842)    | 0.50947<br>(1.2379)           | 0.6431<br>(1.8119)    |
| Pristine Co3O4(10A/g)          | 94.26316<br>(92.3684)                          | 93.31579<br>(91.8947)   | 94.78947<br>(93.2632)   | 93.31579<br>(90.9474)   | 94.89474<br>(91.2632)   | 94.11579<br>(91.9474)    | 0.64<br>(0.6947)              | 0.76849<br>(0.9192)   |

**Table S1** Mean absolute deviation (MAD) and Standard deviation (SD) of the capacitance of Co<sub>3</sub>O<sub>4</sub>@MWCNT nanocable and pristine Co<sub>3</sub>O<sub>4</sub>

Each datum was obtained with 5 cells, which is summerized in the above Table S1. In the case of pristine Co<sub>3</sub>O<sub>4</sub>, the highest mean absolute deviation and standard deviation of the charge and discharge capacitances are 0.6821 (1.2379) and 0.84735 (1.8119), respectively. As to

Co<sub>3</sub>O<sub>4</sub>@MWCNT nanocable, the highest mean absolute deviation and standard deviation of charge and discharge capacitances are 4.5415 (4.5292) and 5.3167 (5.4321). All the results imply the reliability and validity of the specific capacitance data.

### 3. Thermogravimetric analysis (TG) of Co<sub>3</sub>O<sub>4</sub>@MWCNT

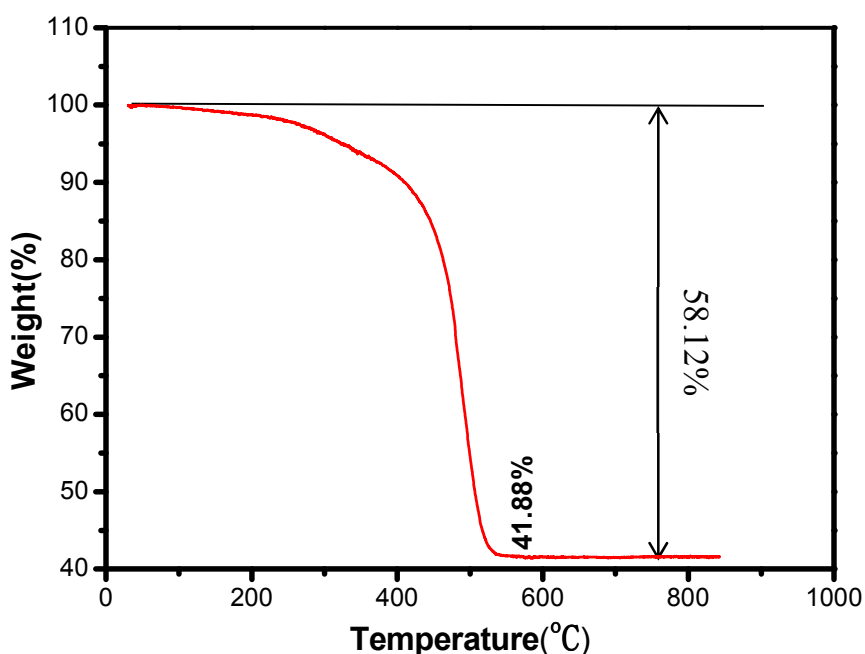

**Figure S2** Thermogravimetric analysis (TG) of Co<sub>3</sub>O<sub>4</sub>@MWCNT in air atmosphere from 10 °C-800 °C at a rate of 10 °C/min.

The mass of Co<sub>3</sub>O<sub>4</sub>@MWCNT sample is 6.0370 mg. Along with the increase of temperature, Co<sub>3</sub>O<sub>4</sub> is remained when MWCNT is completely burnt after 550 °C. Therefore, the mass ratio of Co<sub>3</sub>O<sub>4</sub> in the prepared

nanocable is determined (41.88%).

#### 4. Nyquist plot of $\text{Co}_3\text{O}_4@\text{MWCNT}$ and the pristine $\text{Co}_3\text{O}_4$

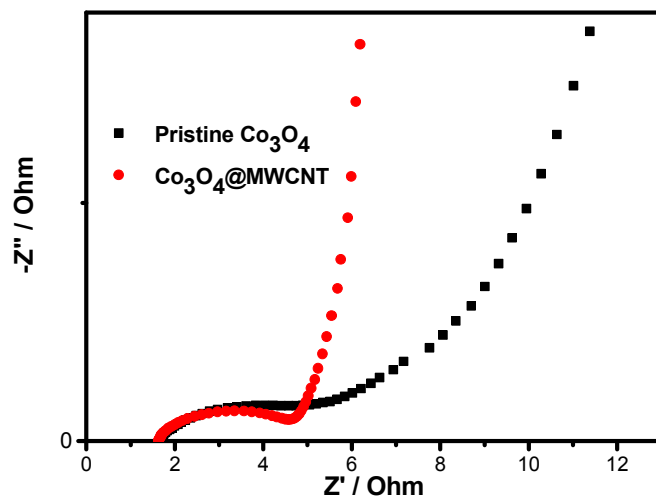

**Figure S3.** Nyquist plot of  $\text{Co}_3\text{O}_4@\text{MWCNT}$  and the pristine  $\text{Co}_3\text{O}_4$  before charge in 0.5 M KOH aqueous solution. The mass loading is 6.33  $\text{mg}/\text{cm}^2$ , which is the same as that of electrodes for cycling, and the frequency range is 0.01 Hz – 10000 Hz.
